# Supplementary material for: Revealing potential diagnostic gene biomarkers of septic shock based on machine learning analysis
Source: Springer Nature journal article supplement (doi:10.1186/s12879-022-07056-4), 2022-01-19
Supplement: MOESM1 [file 20048890]

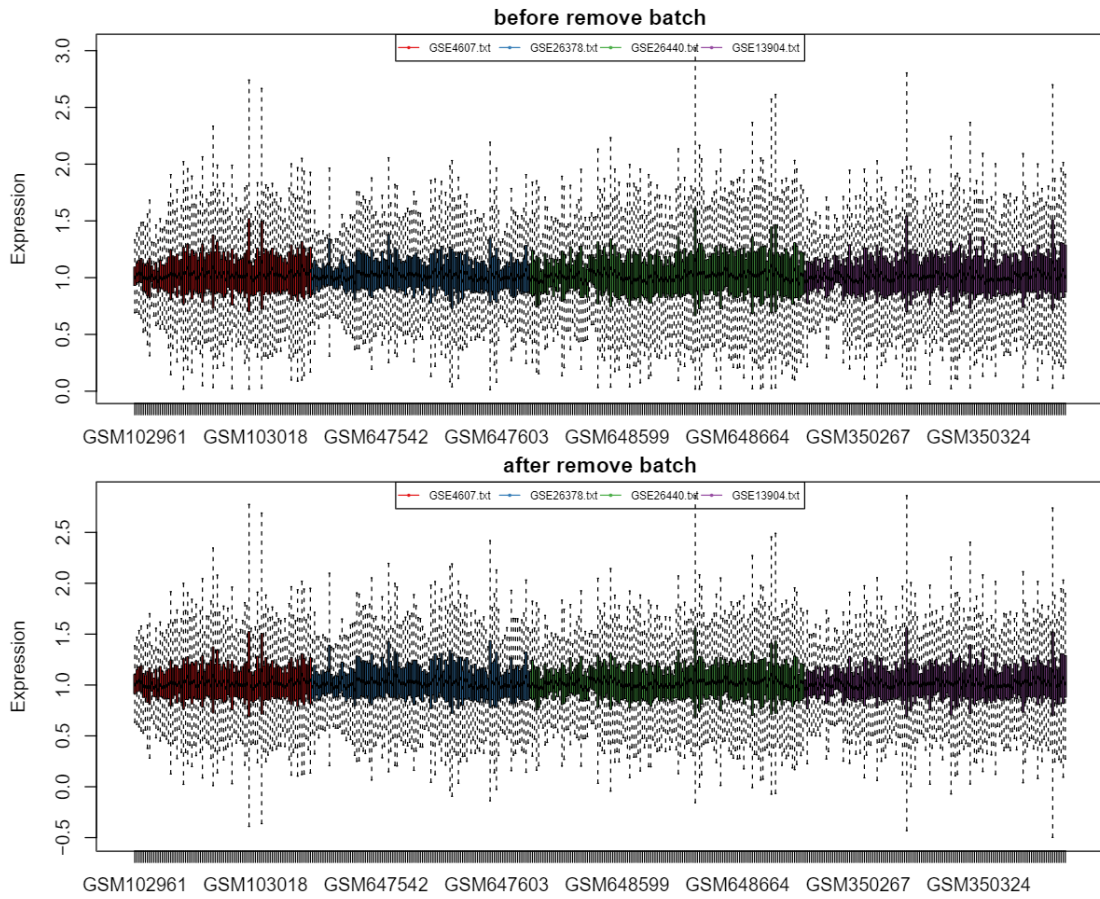

**Figure S1 Batch effect processing between different data sets.**
