# Supplementary material for: Revealing potential diagnostic gene biomarkers of septic shock based on machine learning analysis
Source: Springer Nature journal article supplement (doi:10.1186/s12879-022-07056-4), 2022-01-19
Supplement: MOESM2 [file 20048890]

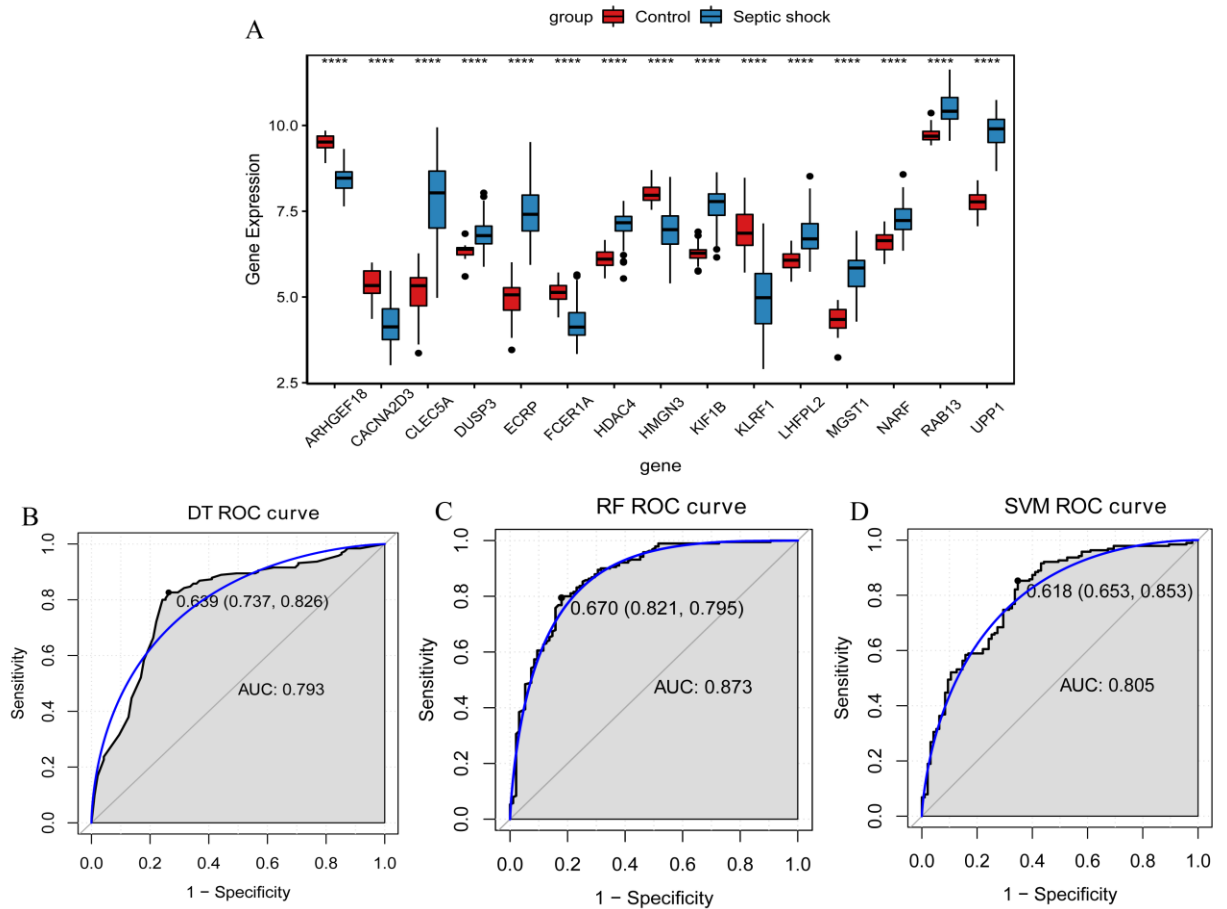

**Figure S2 Validation analysis in GSE95233 data set.**

A: Electronic expression validation of 15 diagnostic gene biomarkers in AA data set.

\*\*\*\* represent  $P < 0.0001$ ; B: ROC curve of DT classifier; C: ROC curve of RF classifier; D: ROC curve of SVM classifier. AUC: area under curve, ROC: receiver operating characteristic.
